# Supplementary material
Source: PubMed Central journal article supplement (PMC3555499)
Supplement: NIHMS402710-supplement-1_si_001.pdf [file NIHMS402710-supplement-1_si_001.pdf]

## **Employment of tandem MS for the accurate and specific identification of oligosaccharide structures**

Shuai Wu<sup>1</sup>, Juli Salcedo<sup>2</sup>, Ning Tang<sup>2</sup>, Keith Waddell<sup>2</sup>, Rudolf Grimm<sup>2, 3</sup>, J. Bruce German<sup>4</sup>  
and Carlito B. Lebrilla<sup>\*1, 5</sup>

1. Department of Chemistry, University of California, Davis, CA 95616
2. Agilent Technologies, Inc., Santa Clara, CA 95051
3. Robert Mondavi Institute for Wine and Department of Food Science and Technology, University of California, Davis, CA 95616
4. Department of Food Science and Technology, University of California, Davis, CA 95616
5. Department of Biochemistry and Molecular Medicine, School of Medicine, University of California, Davis, CA 95616

To whom correspondence should be addressed:

Carlito B. Lebrilla, Email address: [cblebrilla@ucdavis.edu](mailto:cblebrilla@ucdavis.edu); Tel: +1-530-752-6364; Fax:  
+1-530-752-8995

## Captions for the Supplementary Figures

**Figure S1.** A two-dimensional plot with  $m/z$  on the vertical and nanoLC MS retention time on the horizontal axis. Second panel correspond to a partially zoomed in version.

**Figure S2.** The MassHunter interface for the automated compound search in the structural library.

**Figure S3.** NanoLC chromatograms of pooled HMOs (upper panel), from a single human sample (middle panel) and from a single orangutan sample (lower panel) with some structures annotated. a) Base peak chromatograms from MS scan and b) MS/MS scan.

Figure S1

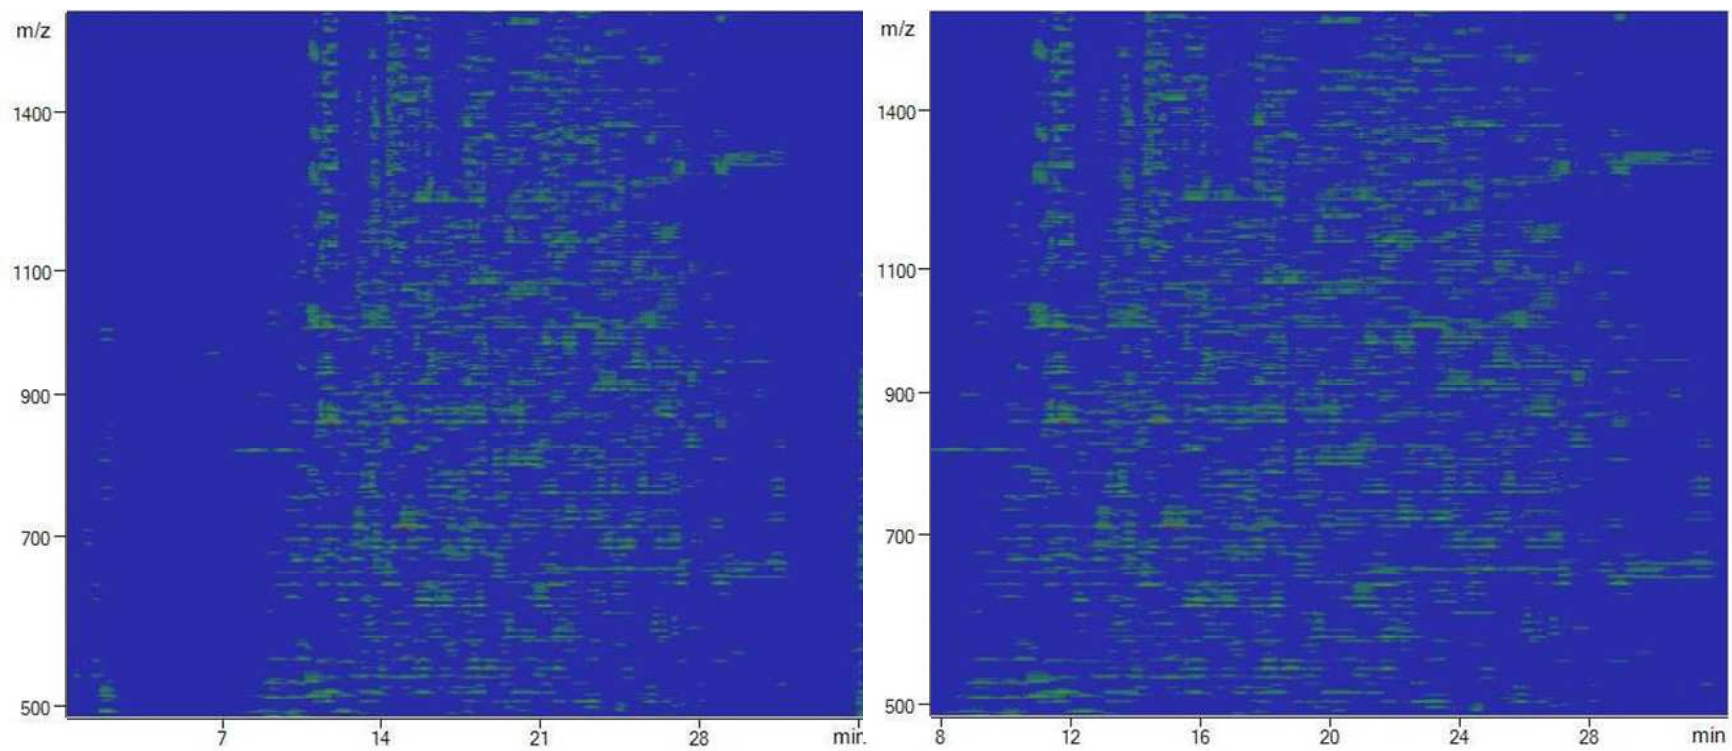

Figure S2.

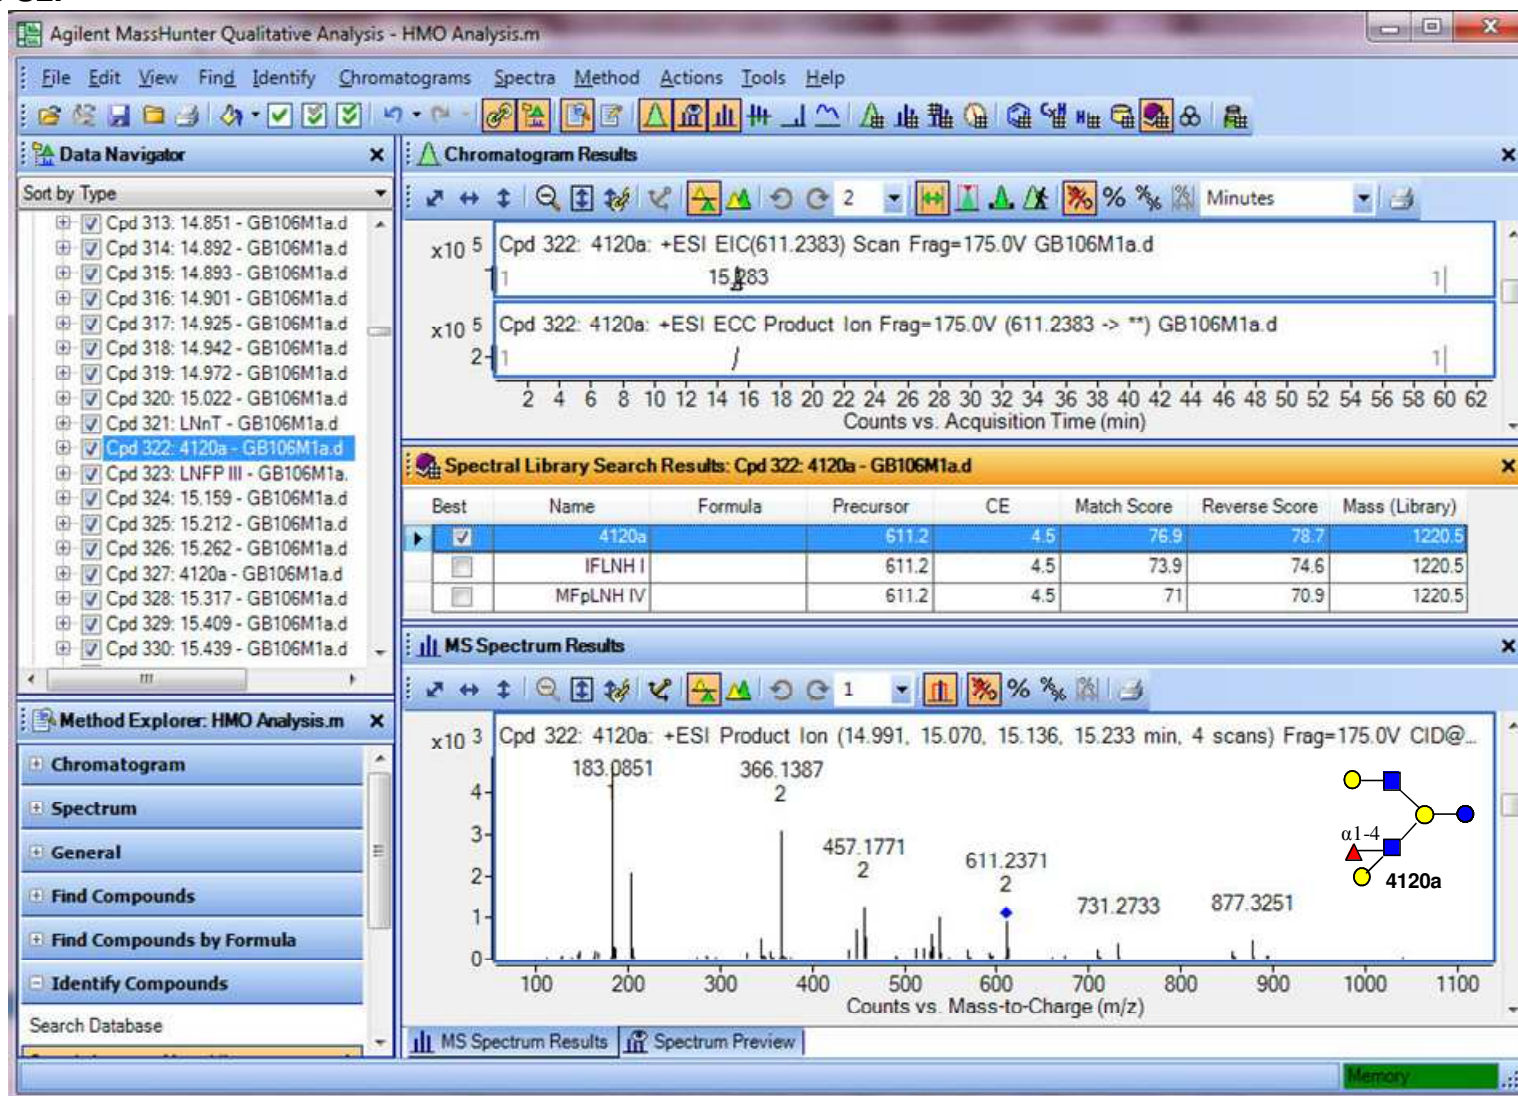

Figure S3.

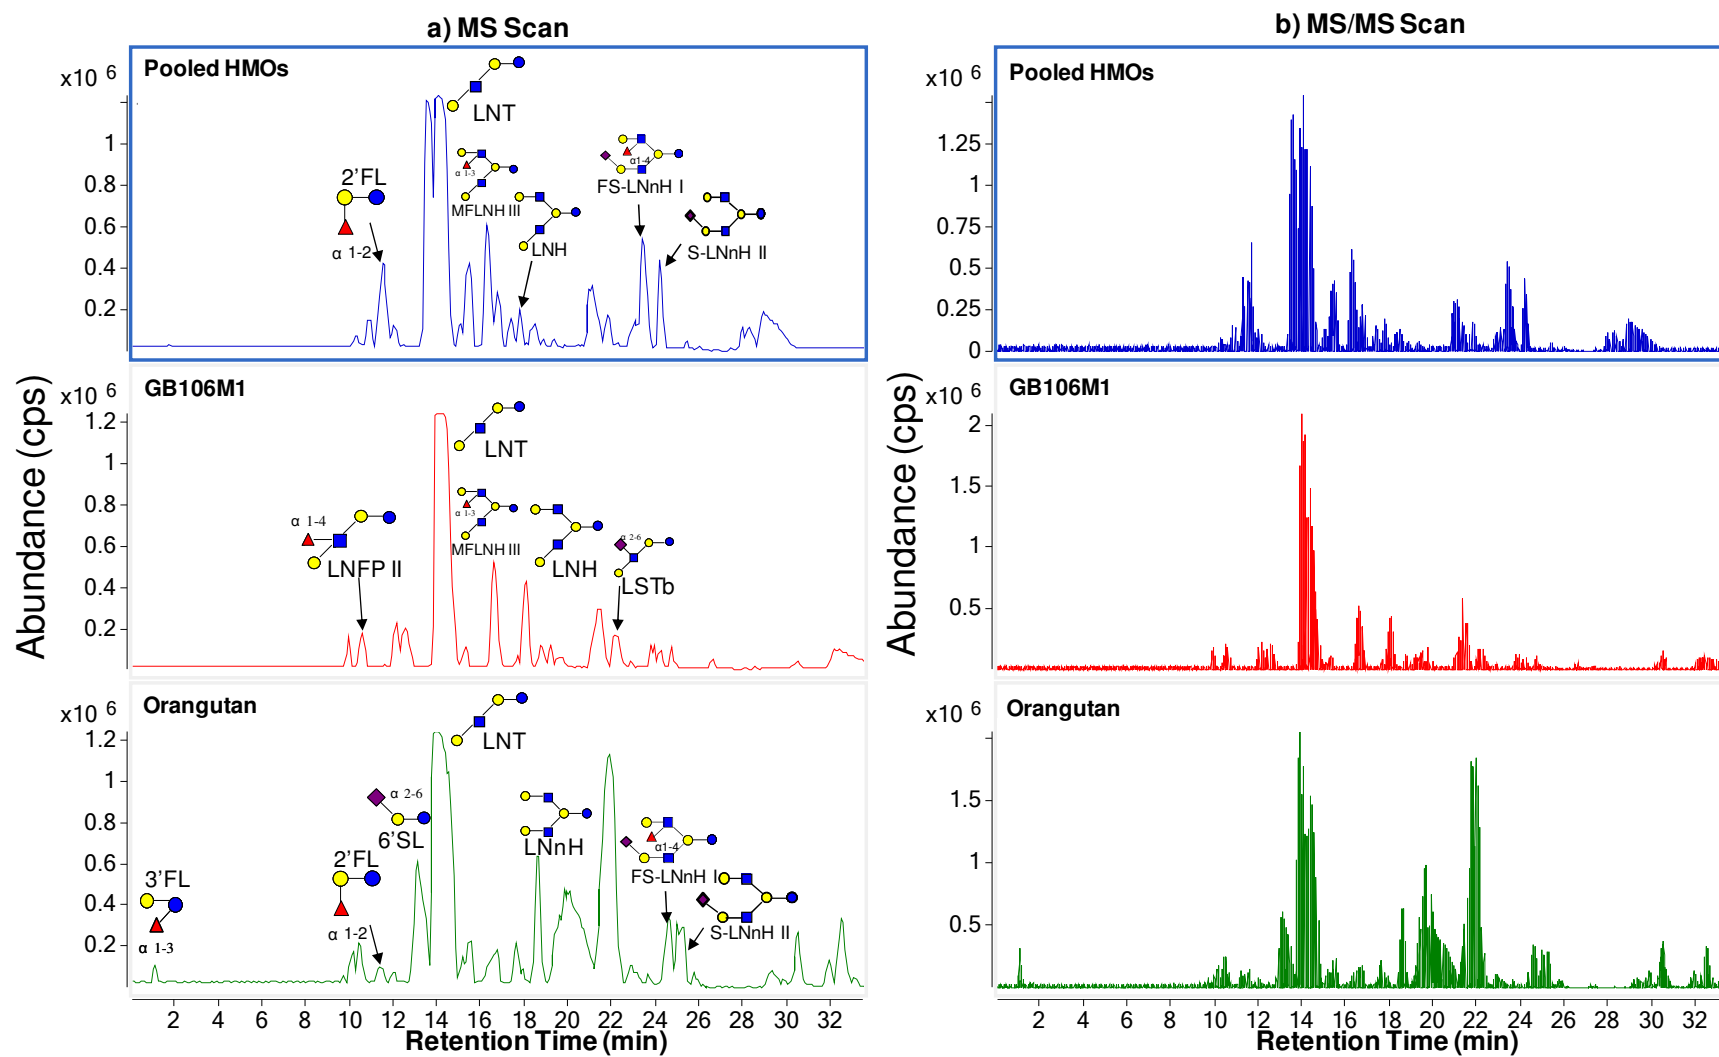

## Captions for the Supplementary Tables

**Table S1.** The automated search result for isomer a) MFLNH III and b) IFLNH III.

**Table S2.** The automated search result for milk oligosaccharides from a single mother with five consecutive runs.

**Table S3.** a) The OS found in Orangutan milk sample using retention time and accurate mass from Chip/Q-TOF; b) The automated library search result for Orangutan OS employing the HMO database.

**Table S1****a)**

| <b>Name</b> | <b>Precursor</b> | <b>CE</b> | <b>Match Score</b> | <b>Reverse Score</b> | <b>Mass (Library)</b> |
|-------------|------------------|-----------|--------------------|----------------------|-----------------------|
| MFLNH III   | 611.2            | 4.5       | 80.5               | 82.4                 | 1220.5                |
| MFLNH I     | 611.2            | 4.5       | 78.4               | 81.7                 | 1220.5                |
| IFLNH III   | 611.2            | 4.5       | 64.9               | 69.7                 | 1220.5                |

**b)**

| <b>Name</b> | <b>Precursor</b> | <b>CE</b> | <b>Match Score</b> | <b>Reverse Score</b> | <b>Mass (Library)</b> |
|-------------|------------------|-----------|--------------------|----------------------|-----------------------|
| IFLNH III   | 611.2            | 4.5       | 65.6               | 75                   | 1220.5                |

**Table S2**

a)

| Cpd | Name                | RT    | m/z      | Mass (DB) | Score (DB) | Hits (DB) | Height  |
|-----|---------------------|-------|----------|-----------|------------|-----------|---------|
| 1   | 2'FL                | 11.44 | 491.196  | 490.19    | 71.75      | 2         | 8693    |
| 2   | 3'SL                | 19.75 | 636.235  | 635.227   | 88.17      | 1         | 81133   |
| 3   | 4021b               | 26.04 | 683.756  | 1365.492  | 64.94      | 1         | 28947   |
| 4   | 4120a               | 14.96 | 611.238  | 1220.454  | 75.61      | 4         | 359673  |
|     | 4120a               | 15.29 | 1221.463 | 1220.454  | 81.72      | 3         | 103253  |
| 5   | 4121b               | 20.95 | 756.781  | 1511.55   | 65.46      | 2         | 26685   |
| 6   | 5130a               | 19.18 | 793.8    | 1585.586  | 81.17      | 4         | 370684  |
| 7   | 5130b               | 20.19 | 793.8    | 1585.586  | 71.27      | 4         | 26872   |
| 8   | 6041a               | 26.42 | 1048.885 | 2095.756  | 61.35      | 1         | 9594    |
| 9   | 6140a               | 23.41 | 976.365  | 1950.719  | 68.82      | 1         | 57286   |
| 10  | 6'SL                | 12.48 | 636.235  | 635.227   | 87.65      | 1         | 216619  |
|     | 6'SL                | 12.95 | 636.235  | 635.227   | 81.02      | 1         | 41129   |
| 11  | DFLNHc              | 20.25 | 684.263  | 1366.512  | 67.13      | 1         | 14065   |
| 12  | DFLNO I             | 17.28 | 866.831  | 1731.644  | 73.14      | 5         | 35032   |
| 13  | DSLNT               | 32.07 | 646.738  | 1291.455  | 79.87      | 1         | 208210  |
|     | DSLNT               | 32.69 | 646.738  | 1291.455  | 76.8       | 1         | 171906  |
|     | DSLNT               | 33.31 | 646.738  | 1291.455  | 73.79      | 1         | 131312  |
| 14  | F-LNH II, MFLNH III | 16.54 | 611.238  | 1220.454  | 81.68      | 3         | 849074  |
| 15  | F-LSTc              | 21.21 | 1147.423 | 1146.417  | 69.22      | 1         | 9003    |
| 16  | FS-LNH I            | 23.28 | 756.781  | 1511.55   | 66.36      | 1         | 27511   |
| 17  | FS-LNnH I           | 23.96 | 756.781  | 1511.55   | 76.55      | 2         | 202029  |
| 18  | FS-LNO              | 24.87 | 939.345  | 1876.682  | 69.37      | 1         | 22644   |
| 19  | IFLNH III           | 16.64 | 1221.463 | 1220.454  | 85.64      | 5         | 238055  |
| 20  | LNDFH II            | 10.25 | 1002.38  | 1001.38   | 71.23      | 1         | 19200   |
| 21  | LNFP II             | 10.19 | 856.326  | 855.322   | 78.08      | 1         | 430899  |
|     | LNFP II             | 10.82 | 856.326  | 855.322   | 78.9       | 1         | 457871  |
| 22  | LNFP III            | 13.85 | 856.326  | 855.322   | 81.14      | 2         | 161192  |
|     | LNFP III            | 14.32 | 856.326  | 855.322   | 77.43      | 2         | 39863   |
| 23  | LNH                 | 18.55 | 538.209  | 1074.396  | 79.19      | 2         | 227167  |
| 24  | LNnH                | 18.82 | 1075.401 | 1074.396  | 73.04      | 2         | 22827   |
|     | LNnH                | 18.99 | 538.209  | 1074.396  | 68.75      | 2         | 88255   |
| 25  | LNT                 | 13.94 | 710.272  | 709.264   | 92.95      | 1         | 5820999 |
| 26  | LNnT                | 14.68 | 710.272  | 709.264   | 92.47      | 1         | 3592858 |
| 27  | LSTa                | 25.30 | 501.188  | 1000.359  | 65.14      | 2         | 30637   |
|     | LSTa                | 25.27 | 1001.367 | 1000.359  | 84.59      | 1         | 45151   |
| 28  | LSTb                | 22.07 | 1001.367 | 1000.359  | 82         | 3         | 260778  |
|     | LSTb                | 22.63 | 1001.367 | 1000.359  | 78.4       | 3         | 125809  |
| 29  | p-LNH               | 22.12 | 538.209  | 1074.396  | 65.86      | 2         | 67537   |



|    |          |       |         |          |       |   |        |
|----|----------|-------|---------|----------|-------|---|--------|
| 30 | S-LNH    | 23.77 | 683.756 | 1365.492 | 78.74 | 1 | 166481 |
| 31 | SLNnH II | 24.51 | 683.756 | 1365.492 | 73.21 | 2 | 151093 |

b)

| Cpd | Name                | RT    | m/z      | Mass (DB) | Score (DB) | Hits (DB) | Height  |
|-----|---------------------|-------|----------|-----------|------------|-----------|---------|
| 1   | 2'FL                | 11.47 | 491.196  | 490.19    | 74.65      | 1         | 7853    |
| 2   | 3'SL                | 19.59 | 636.236  | 635.227   | 89.2       | 1         | 79817   |
|     | 3'SL                | 20.06 | 636.236  | 635.227   | 84.31      | 1         | 25406   |
| 3   | 4021b               | 26.14 | 683.755  | 1365.492  | 62.64      | 1         | 17644   |
| 4   | 4120a               | 15.16 | 1221.464 | 1220.454  | 81.81      | 3         | 94735   |
| 5   | 4121b               | 20.98 | 756.783  | 1511.55   | 70.64      | 2         | 24543   |
| 6   | 5130a               | 19.10 | 793.8    | 1585.586  | 81.75      | 4         | 305810  |
| 7   | 5130b               | 20.22 | 793.8    | 1585.586  | 70.02      | 5         | 31978   |
| 8   | 6041a               | 26.50 | 1048.88  | 2095.756  | 60.93      | 1         | 8487    |
| 9   | 6140a               | 23.36 | 976.365  | 1950.719  | 69.41      | 1         | 78922   |
| 10  | 6'SL                | 12.47 | 636.236  | 635.227   | 86.56      | 1         | 245059  |
|     | 6'SL                | 12.85 | 636.236  | 635.227   | 83.5       | 1         | 140403  |
| 11  | DFLNHa              | 13.80 | 684.264  | 1366.512  | 62.04      | 2         | 25199   |
| 12  | DFLNHc              | 20.10 | 684.264  | 1366.512  | 60.08      | 1         | 12565   |
| 13  | DFLNO I             | 17.15 | 866.829  | 1731.644  | 70.5       | 5         | 27721   |
| 14  | DSLNT               | 32.56 | 646.738  | 1291.455  | 77.31      | 1         | 140734  |
|     | DSLNT               | 33.17 | 1292.461 | 1291.455  | 71.71      | 1         | 16726   |
|     | DSLNT               | 33.34 | 646.738  | 1291.455  | 79.72      | 1         | 212402  |
|     | DSLNT               | 34.01 | 646.738  | 1291.455  | 73.51      | 1         | 136539  |
| 15  | F-LNH II, MFLNH III | 16.66 | 611.238  | 1220.454  | 80.75      | 4         | 909918  |
| 16  | F-LSTc              | 21.14 | 574.216  | 1146.417  | 60.85      | 1         | 9815    |
|     | F-LSTc              | 21.22 | 1147.421 | 1146.417  | 65.48      | 1         | 8668    |
| 17  | FS-LNH I            | 23.55 | 756.783  | 1511.55   | 66.38      | 2         | 27755   |
| 18  | FS-LNH II           | 26.36 | 756.783  | 1511.55   | 62.15      | 1         | 14874   |
| 19  | FS-LNnH I           | 24.27 | 756.783  | 1511.55   | 78.48      | 2         | 118321  |
| 20  | FS-LNO              | 24.88 | 939.344  | 1876.682  | 64.46      | 1         | 20921   |
| 21  | IFLNH III           | 16.58 | 1221.464 | 1220.454  | 84.58      | 5         | 197372  |
| 22  | LNDFH II            | 10.39 | 1002.382 | 1001.38   | 71.43      | 1         | 17219   |
| 23  | LNFP II             | 10.12 | 856.327  | 855.322   | 77.69      | 1         | 330563  |
|     | LNFP II             | 10.86 | 856.327  | 855.322   | 78.08      | 1         | 90536   |
| 24  | LNFP III            | 13.76 | 856.327  | 855.322   | 83.02      | 2         | 144211  |
|     | LNFP III            | 14.17 | 856.327  | 855.322   | 79.72      | 2         | 31973   |
| 25  | LNH                 | 18.69 | 1075.403 | 1074.396  | 71         | 2         | 23067   |
| 26  | LNnH                | 19.78 | 538.209  | 1074.396  | 72.65      | 2         | 30956   |
| 27  | LNT                 | 13.83 | 710.271  | 709.264   | 93.26      | 1         | 4866233 |
|     | LNT                 | 14.63 | 710.271  | 709.264   | 91.7       | 1         | 2699338 |

|    |          |       |          |          |       |   |        |
|----|----------|-------|----------|----------|-------|---|--------|
| 28 | LSTa     | 25.43 | 1001.365 | 1000.359 | 85.13 | 1 | 43879  |
|    | LSTa     | 25.45 | 501.189  | 1000.359 | 61.6  | 2 | 25751  |
| 29 | LSTb     | 22.11 | 1001.365 | 1000.359 | 84.38 | 3 | 336822 |
|    | LSTb     | 22.72 | 1001.365 | 1000.359 | 77.74 | 3 | 94283  |
|    | LSTb     | 22.85 | 501.189  | 1000.359 | 62.84 | 1 | 32778  |
| 30 | LSTc     | 22.38 | 501.189  | 1000.359 | 69.41 | 3 | 82662  |
| 31 | S-LNH    | 23.77 | 683.755  | 1365.492 | 73.89 | 1 | 128768 |
| 32 | SLNnH II | 24.43 | 683.755  | 1365.492 | 75.77 | 3 | 154222 |

c)

| Cpd | Name                | RT    | m/z      | Mass (DB) | Score (DB) | Hits (DB) | Height |
|-----|---------------------|-------|----------|-----------|------------|-----------|--------|
| 1   | 2'FL                | 11.44 | 491.195  | 490.19    | 77.13      | 2         | 7267   |
| 2   | 3'FL                | 1.64  | 491.195  | 490.19    | 61.71      | 1         | 4989   |
| 3   | 3'SL                | 20.03 | 636.238  | 635.227   | 89.7       | 1         | 91224  |
|     | 3'SL                | 20.40 | 636.238  | 635.227   | 73.3       | 1         | 11003  |
| 4   | 4021b               | 26.19 | 683.757  | 1365.492  | 62.94      | 1         | 24185  |
| 5   | 4120a               | 14.86 | 611.238  | 1220.454  | 74.07      | 3         | 284226 |
|     | 4120a               | 15.28 | 1221.464 | 1220.454  | 82.77      | 3         | 94027  |
| 6   | 4121b               | 20.96 | 756.783  | 1511.55   | 67.73      | 2         | 28110  |
| 7   | 5130a               | 19.13 | 793.8    | 1585.586  | 82.69      | 4         | 374543 |
| 8   | 6041a               | 26.56 | 1048.883 | 2095.756  | 64.05      | 1         | 11338  |
| 9   | 6140a               | 23.43 | 976.367  | 1950.719  | 68.56      | 1         | 72239  |
| 10  | 6'SL                | 12.58 | 636.238  | 635.227   | 87.2       | 1         | 221496 |
|     | 6'SL                | 13.03 | 636.238  | 635.227   | 77.41      | 1         | 58726  |
| 11  | DFLNHa              | 13.81 | 684.264  | 1366.512  | 60.59      | 2         | 25658  |
| 12  | DFLNHc              | 20.16 | 684.264  | 1366.512  | 62.85      | 2         | 12423  |
| 13  | DFLNO I             | 17.20 | 866.829  | 1731.644  | 73.43      | 5         | 33535  |
| 14  | DSLNT               | 33.17 | 646.738  | 1291.455  | 78.3       | 1         | 40249  |
|     | DSLNT               | 33.83 | 646.738  | 1291.455  | 78.39      | 1         | 176237 |
|     | DSLNT               | 34.07 | 1292.46  | 1291.455  | 71.04      | 1         | 13909  |
| 15  | F-LNH I, MFLNH I    | 17.06 | 611.238  | 1220.454  | 71.41      | 4         | 277540 |
| 16  | F-LNH II, MFLNH III | 16.43 | 611.238  | 1220.454  | 78.95      | 3         | 746213 |
| 17  | F-LSTc              | 21.32 | 1147.423 | 1146.417  | 61.32      | 1         | 8547   |
| 18  | FS-LNH I            | 23.59 | 756.783  | 1511.55   | 68.75      | 2         | 27915  |
| 19  | FS-LNH II           | 26.40 | 756.783  | 1511.55   | 62.27      | 1         | 11099  |
| 20  | FS-LNnH I           | 24.27 | 756.783  | 1511.55   | 79.8       | 2         | 229865 |
| 21  | FS-LNO              | 24.99 | 939.347  | 1876.682  | 66.64      | 1         | 21619  |
| 22  | IFLNH III           | 16.56 | 1221.464 | 1220.454  | 84.14      | 4         | 230174 |
| 23  | LNDFH II            | 10.17 | 1002.383 | 1001.38   | 72.13      | 1         | 17420  |
| 24  | LNFP II             | 10.57 | 856.327  | 855.322   | 78.31      | 1         | 434466 |

|    |          |       |          |          |       |   |         |
|----|----------|-------|----------|----------|-------|---|---------|
|    | LNFP II  | 11.07 | 856.327  | 855.322  | 77.82 | 1 | 10358   |
| 25 | LNFP III | 13.78 | 856.327  | 855.322  | 83.34 | 2 | 176782  |
|    | LNFP III | 14.40 | 856.327  | 855.322  | 72.95 | 2 | 20982   |
| 26 | LNH      | 17.85 | 538.208  | 1074.396 | 71.48 | 1 | 588731  |
| 27 | LNnH     | 18.04 | 1075.403 | 1074.396 | 76.2  | 2 | 156645  |
|    | LNnH     | 18.51 | 538.208  | 1074.396 | 78.34 | 2 | 213243  |
| 28 | LNT      | 14.16 | 710.273  | 709.264  | 93.49 | 1 | 5263069 |
| 29 | LNnT     | 14.80 | 710.273  | 709.264  | 86.63 | 1 | 1154642 |
| 30 | LSTa     | 25.45 | 1001.366 | 1000.359 | 86.72 | 1 | 49653   |
| 31 | LSTb     | 22.32 | 1001.366 | 1000.359 | 84.06 | 3 | 373052  |
|    | LSTb     | 22.40 | 501.188  | 1000.359 | 75.42 | 3 | 89080   |
|    | LSTb     | 22.83 | 1001.366 | 1000.359 | 78.17 | 3 | 89600   |
| 32 | S-LNH    | 23.77 | 683.757  | 1365.492 | 78.39 | 1 | 175437  |
| 33 | SLNnH II | 24.49 | 683.757  | 1365.492 | 78.54 | 2 | 176593  |

d)

| Cpd | Name                | RT    | m/z      | Mass (DB) | Score (DB) | Hits (DB) | Height  |
|-----|---------------------|-------|----------|-----------|------------|-----------|---------|
| 1   | 3'FL                | 1.63  | 491.198  | 490.19    | 74.83      | 2         | 6182    |
| 2   | 2'FL                | 11.41 | 491.198  | 490.19    | 73.36      | 2         | 9500    |
| 3   | 3'SL                | 20.07 | 636.236  | 635.227   | 89.87      | 1         | 82469   |
|     | 3'SL                | 20.45 | 636.236  | 635.227   | 84.54      | 1         | 23549   |
| 4   | 4021b               | 25.76 | 683.754  | 1365.492  | 64.58      | 1         | 27102   |
|     | 4021b               | 26.47 | 683.754  | 1365.492  | 62.4       | 1         | 22505   |
| 5   | 4120a               | 15.43 | 611.239  | 1220.454  | 72.19      | 4         | 332646  |
| 6   | 4121b               | 21.01 | 756.783  | 1511.55   | 72.27      | 2         | 27779   |
| 7   | 5130a               | 19.14 | 793.799  | 1585.586  | 82.3       | 4         | 439503  |
| 8   | 6140a               | 23.33 | 976.364  | 1950.719  | 65.62      | 1         | 53212   |
| 9   | 6'SL                | 12.65 | 636.236  | 635.227   | 87.16      | 1         | 292326  |
|     | 6'SL                | 13.18 | 636.236  | 635.227   | 70.64      | 1         | 86984   |
| 10  | DFLNHb              | 13.78 | 684.262  | 1366.512  | 61.63      | 2         | 30395   |
| 11  | DFLNHc              | 20.21 | 684.262  | 1366.512  | 60.39      | 1         | 11707   |
| 12  | DFLNO I             | 17.14 | 866.827  | 1731.644  | 75.1       | 5         | 35555   |
| 13  | DSLNT               | 34.09 | 646.737  | 1291.455  | 75.39      | 1         | 46776   |
|     | DSLNT               | 34.73 | 646.737  | 1291.455  | 82.03      | 1         | 85841   |
|     | DSLNT               | 34.88 | 1292.46  | 1291.455  | 63.36      | 1         | 7528    |
| 14  | F-LNH II, MFLNH III | 16.24 | 611.239  | 1220.454  | 79.83      | 3         | 1016071 |
|     | F-LNH II, MFLNH III | 16.53 | 1221.463 | 1220.454  | 84.22      | 4         | 247009  |
|     | F-LNH II, MFLNH III | 16.83 | 611.239  | 1220.454  | 78.76      | 5         | 1181284 |
| 15  | F-LSTc              | 21.43 | 1147.42  | 1146.417  | 68.18      | 1         | 7490    |
| 16  | FS-LNH I            | 23.73 | 756.783  | 1511.55   | 71.54      | 2         | 25921   |

|    |           |       |          |          |       |   |         |
|----|-----------|-------|----------|----------|-------|---|---------|
| 17 | FS-LNH II | 26.39 | 756.783  | 1511.55  | 63.34 | 1 | 16642   |
| 18 | FS-LNnH I | 24.36 | 756.783  | 1511.55  | 75.83 | 2 | 201603  |
| 19 | FS-LNO    | 24.88 | 939.344  | 1876.682 | 71.22 | 1 | 23716   |
| 20 | IFLNH III | 17.44 | 611.239  | 1220.454 | 77.43 | 4 | 134557  |
|    | IFLNH III | 17.66 | 1221.463 | 1220.454 | 74.47 | 2 | 30456   |
| 21 | LNDFH II  | 10.08 | 1002.38  | 1001.38  | 71.63 | 1 | 15519   |
| 22 | LNFP II   | 10.62 | 856.327  | 855.322  | 78.37 | 1 | 494396  |
|    | LNFP II   | 11.05 | 856.327  | 855.322  | 67.18 | 1 | 5206    |
| 23 | LNFP III  | 13.72 | 856.327  | 855.322  | 82.77 | 2 | 175578  |
|    | LNFP III  | 14.33 | 856.327  | 855.322  | 77.76 | 1 | 16974   |
| 24 | LNH       | 17.72 | 538.208  | 1074.396 | 73.31 | 2 | 1089701 |
|    | LNH       | 17.99 | 1075.401 | 1074.396 | 80.25 | 2 | 169560  |
| 25 | LNnH      | 18.59 | 1075.401 | 1074.396 | 75.52 | 2 | 28543   |
| 26 | LNT       | 13.71 | 710.272  | 709.264  | 92.39 | 1 | 4648647 |
| 27 | LNnT      | 14.30 | 710.272  | 709.264  | 92.81 | 1 | 4434954 |
| 28 | LSTa      | 25.58 | 1001.366 | 1000.359 | 84.78 | 1 | 50133   |
| 29 | LSTb      | 22.29 | 1001.366 | 1000.359 | 81.25 | 3 | 265552  |
|    | LSTb      | 22.74 | 1001.366 | 1000.359 | 82.62 | 3 | 152742  |
| 30 | LSTc      | 22.46 | 501.189  | 1000.359 | 72.16 | 3 | 127703  |
| 31 | MFpLNH IV | 15.21 | 1221.463 | 1220.454 | 83.53 | 3 | 97227   |
| 32 | S-LNH     | 23.81 | 683.754  | 1365.492 | 79.48 | 1 | 100683  |
| 33 | SLNnH II  | 24.42 | 683.754  | 1365.492 | 74.38 | 3 | 67150   |
|    | SLNnH II  | 25.06 | 683.754  | 1365.492 | 73.21 | 1 | 202694  |

e)

| Cpd | Name    | RT    | m/z     | Mass (DB) | Score (DB) | Hits (DB) | Height |
|-----|---------|-------|---------|-----------|------------|-----------|--------|
| 1   | 2'FL    | 11.38 | 491.194 | 490.19    | 78.87      | 2         | 9100   |
| 2   | 3'FL    | 1.62  | 491.194 | 490.19    | 72.43      | 2         | 6507   |
| 3   | 3'SL    | 20.27 | 636.236 | 635.227   | 89.27      | 1         | 86879  |
| 4   | 4021b   | 26.20 | 683.754 | 1365.492  | 69.07      | 1         | 25236  |
| 5   | 4120a   | 14.90 | 611.238 | 1220.454  | 75.83      | 5         | 396081 |
|     | 4120a   | 15.37 | 611.238 | 1220.454  | 80.27      | 6         | 339535 |
| 6   | 4121b   | 21.03 | 756.782 | 1511.55   | 68.41      | 2         | 27103  |
| 7   | 5130a   | 19.13 | 793.798 | 1585.586  | 83.73      | 4         | 234966 |
|     | 5130a   | 19.90 | 793.798 | 1585.586  | 72.47      | 4         | 23352  |
| 8   | 6140a   | 23.25 | 976.365 | 1950.719  | 69.23      | 1         | 58492  |
| 9   | 6'SL    | 12.68 | 636.231 | 635.227   | 87.09      | 1         | 290074 |
|     | 6'SL    | 13.25 | 636.236 | 635.227   | 82.98      | 1         | 42080  |
| 10  | DFLNHb  | 13.76 | 684.262 | 1366.512  | 61         | 1         | 25403  |
| 11  | DFLNO I | 17.19 | 866.827 | 1731.644  | 69.05      | 5         | 38082  |

|    |                     |       |          |          |       |   |         |
|----|---------------------|-------|----------|----------|-------|---|---------|
| 12 | DSLNT               | 29.79 | 646.736  | 1291.455 | 81.41 | 1 | 37489   |
|    | DSLNT               | 30.48 | 646.736  | 1291.455 | 77.36 | 1 | 22213   |
|    | DSLNT               | 31.12 | 646.736  | 1291.455 | 71.98 | 1 | 13608   |
| 13 | F-LNH II, MFLNH III | 16.26 | 611.238  | 1220.454 | 78.97 | 3 | 1105525 |
|    | F-LNH II, MFLNH III | 16.58 | 1221.464 | 1220.454 | 85.22 | 5 | 202896  |
|    | F-LNH II, MFLNH III | 16.90 | 611.238  | 1220.454 | 73.49 | 4 | 919127  |
| 14 | F-LSTc              | 21.38 | 1147.42  | 1146.417 | 68.39 | 1 | 8149    |
| 15 | FS-LNH I            | 23.86 | 756.782  | 1511.55  | 74.49 | 4 | 47172   |
| 16 | FS-LNH II           | 26.47 | 756.782  | 1511.55  | 62.73 | 1 | 11939   |
| 17 | FS-LNnH I           | 24.42 | 756.782  | 1511.55  | 74.32 | 2 | 289317  |
| 18 | FS-LNO              | 24.83 | 939.344  | 1876.682 | 70.22 | 1 | 24847   |
| 19 | IFLNH III           | 17.52 | 611.238  | 1220.454 | 72.26 | 2 | 140974  |
|    | IFLNH III           | 17.71 | 1221.464 | 1220.454 | 63.27 | 1 | 22074   |
| 20 | LNDFH II            | 10.12 | 1002.383 | 1001.38  | 71.45 | 1 | 19572   |
| 21 | LNFP II             | 10.45 | 856.326  | 855.322  | 78.26 | 2 | 460447  |
|    | LNFP II             | 11.00 | 856.326  | 855.322  | 77.17 | 1 | 10258   |
| 22 | LNFP III            | 13.74 | 856.326  | 855.322  | 82.28 | 2 | 158204  |
|    | LNFP III            | 14.40 | 856.326  | 855.322  | 74.04 | 2 | 17177   |
| 23 | LNH                 | 18.04 | 538.207  | 1074.396 | 83.19 | 2 | 661642  |
| 24 | LNnH                | 18.66 | 1075.401 | 1074.396 | 69.76 | 2 | 26314   |
|    | LNnH                | 18.69 | 538.207  | 1074.396 | 75.71 | 2 | 201956  |
| 25 | LNT                 | 13.74 | 710.272  | 709.264  | 92.78 | 1 | 5191929 |
| 26 | LNnT                | 14.38 | 710.272  | 709.264  | 93.44 | 1 | 4720548 |
| 27 | LSTa                | 25.58 | 1001.366 | 1000.359 | 87.48 | 1 | 44727   |
|    | LSTa                | 25.78 | 501.188  | 1000.359 | 77.08 | 2 | 38408   |
| 28 | LSTb                | 22.37 | 1001.366 | 1000.359 | 83.54 | 3 | 294053  |
|    | LSTb                | 22.95 | 1001.366 | 1000.359 | 80.93 | 3 | 65627   |
| 29 | LSTc                | 22.46 | 501.188  | 1000.359 | 72.24 | 3 | 109861  |
| 30 | MFpLNH IV           | 15.17 | 1221.464 | 1220.454 | 84.5  | 3 | 91364   |
| 31 | S-LNH               | 23.75 | 683.754  | 1365.492 | 79.32 | 1 | 244024  |
|    | S-LNH               | 24.04 | 1366.496 | 1365.492 | 71.27 | 2 | 9207    |
| 32 | SLNnH II            | 24.52 | 683.754  | 1365.492 | 73.68 | 3 | 210021  |
|    | SLNnH II            | 25.17 | 683.754  | 1365.492 | 70.1  | 1 | 146542  |

Table S3a

| Cpd | Mass (exp) | Mass (cal) | Error  | Hex | Fuc | HexNAc | NeuAc | NeuGc | RT    | Abund.    |
|-----|------------|------------|--------|-----|-----|--------|-------|-------|-------|-----------|
| 1   | 490.1887   | 490.1897   | -0.001 | 2   | 1   |        |       |       | 1.65  | 582284    |
| 2   | 490.1906   | 490.1897   | 0.0009 | 2   | 1   |        |       |       | 11.41 | 5849170   |
| 3   | 490.1897   | 490.1897   | 0      | 2   | 1   |        |       |       | 13.80 | 525393    |
| 4   | 506.1858   | 506.1846   | 0.0012 | 3   |     |        |       |       | 10.13 | 4928841   |
| 5   | 506.1841   | 506.1846   | -5E-04 | 3   |     |        |       |       | 14.12 | 206650    |
| 6   | 635.231    | 635.2272   | 0.0038 | 2   |     |        | 1     |       | 13.17 | 20769672  |
| 7   | 635.2312   | 635.2272   | 0.004  | 2   |     |        | 1     |       | 20.10 | 16991408  |
| 8   | 651.2249   | 651.2221   | 0.0028 | 2   |     |        |       | 1     | 12.91 | 1381356   |
| 9   | 651.227    | 651.2221   | 0.0049 | 2   |     |        |       | 1     | 19.58 | 1711533   |
| 10  | 652.2548   | 652.2425   | 0.0123 | 3   | 1   |        |       |       | 20.03 | 1698727   |
| 11  | 676.2517   | 676.2538   | -0.002 | 1   |     | 1      | 1     |       | 12.98 | 117598    |
| 12  | 709.2629   | 709.264    | -0.001 | 3   |     | 1      |       |       | 10.49 | 222000    |
| 13  | 709.2658   | 709.264    | 0.0018 | 3   |     | 1      |       |       | 12.02 | 1903066   |
| 14  | 709.2679   | 709.264    | 0.0039 | 3   |     | 1      |       |       | 14.08 | 113585448 |
| 15  | 781.2829   | 781.2851   | -0.002 | 2   | 1   |        | 1     |       | 17.44 | 567460    |
| 16  | 797.2789   | 797.28     | -0.001 | 2   | 1   |        |       | 1     | 23.89 | 88937     |
| 17  | 838.3065   | 838.3066   | -1E-04 | 2   |     | 1      | 1     |       | 23.18 | 408372    |
| 18  | 855.3261   | 855.3219   | 0.0042 | 3   | 1   | 1      |       |       | 10.48 | 6385175   |
| 19  | 855.3238   | 855.3219   | 0.0019 | 3   | 1   | 1      |       |       | 13.63 | 1413876   |
| 20  | 871.321    | 871.3168   | 0.0042 | 4   |     | 1      |       |       | 15.49 | 5851423   |
| 21  | 912.3479   | 912.3434   | 0.0045 | 3   |     | 2      |       |       | 17.91 | 991866    |
| 22  | 1000.3657  | 1000.3594  | 0.0063 | 3   |     | 1      | 1     |       | 22.92 | 5013286   |
| 23  | 1000.3655  | 1000.3594  | 0.0061 | 3   |     | 1      | 1     |       | 23.14 | 2208376   |
| 24  | 1016.3532  | 1016.3543  | -0.001 | 3   |     | 1      |       | 1     | 22.72 | 381166    |
| 25  | 1017.3778  | 1017.3747  | 0.0031 | 4   | 1   | 1      |       |       | 13.21 | 1512615   |
| 26  | 1074.4055  | 1074.3962  | 0.0093 | 4   |     | 2      |       |       | 15.14 | 546984    |
| 27  | 1074.4056  | 1074.3962  | 0.0094 | 4   |     | 2      |       |       | 18.61 | 27681444  |
| 28  | 1074.4013  | 1074.3962  | 0.0051 | 4   |     | 2      |       |       | 21.71 | 1361048   |
| 29  | 1162.4115  | 1162.4122  | -7E-04 | 4   |     | 1      | 1     |       | 22.40 | 157723    |
| 30  | 1220.4546  | 1220.4541  | 0.0005 | 4   | 1   | 2      |       |       | 12.40 | 168922    |
| 31  | 1220.4696  | 1220.4541  | 0.0155 | 4   | 1   | 2      |       |       | 15.17 | 5590550   |
| 32  | 1220.4501  | 1220.4541  | -0.004 | 4   | 1   | 2      |       |       | 16.60 | 123765    |
| 33  | 1220.4674  | 1220.4541  | 0.0133 | 4   | 1   | 2      |       |       | 17.62 | 7873134   |
| 34  | 1291.4528  | 1291.4548  | -0.002 | 3   |     | 1      | 2     |       | 25.58 | 473713    |
| 35  | 1365.504   | 1365.4916  | 0.0124 | 4   |     | 2      | 1     |       | 25.02 | 9484554   |
| 36  | 1366.5242  | 1366.512   | 0.0122 | 4   | 2   | 2      |       |       | 13.74 | 2566509   |
| 37  | 1381.498   | 1381.4865  | 0.0115 | 4   |     | 2      |       | 1     | 24.92 | 708389    |
| 38  | 1382.5057  | 1382.5069  | -0.001 | 5   | 1   | 2      |       |       | 16.61 | 175307    |

|    |           |           |        |   |   |   |   |       |         |
|----|-----------|-----------|--------|---|---|---|---|-------|---------|
| 39 | 1439.5317 | 1439.5284 | 0.0033 | 5 |   | 3 |   | 23.04 | 244919  |
| 40 | 1439.5401 | 1439.5284 | 0.0117 | 5 |   | 3 |   | 23.66 | 2146217 |
| 41 | 1511.548  | 1511.5495 | -0.002 | 4 | 1 | 2 | 1 | 21.26 | 172680  |
| 42 | 1511.5599 | 1511.5495 | 0.0104 | 4 | 1 | 2 | 1 | 24.55 | 7155953 |
| 43 | 1527.549  | 1527.5444 | 0.0046 | 5 |   | 2 | 1 | 24.45 | 607964  |
| 44 | 1585.583  | 1585.5863 | -0.003 | 5 | 1 | 3 |   | 19.03 | 146124  |
| 45 | 1585.5885 | 1585.5863 | 0.0022 | 5 | 1 | 3 |   | 20.42 | 166548  |
| 46 | 1656.5943 | 1656.587  | 0.0073 | 4 |   | 2 | 2 | 34.23 | 338378  |
| 47 | 1731.6421 | 1731.6442 | -0.002 | 5 | 2 | 3 |   | 16.94 | 175233  |
| 48 | 1804.6575 | 1804.6606 | -0.003 | 6 |   | 4 |   | 24.35 | 307189  |
| 49 | 1876.6776 | 1876.6817 | -0.004 | 5 | 1 | 3 | 1 | 24.95 | 127137  |

Table S3b

| Cpd | Name                | RT    | <i>m/z</i> | Mass (DB) | Score (DB) | Hits (DB) | Height  |
|-----|---------------------|-------|------------|-----------|------------|-----------|---------|
| 1   | 3'FL                | 1.67  | 491.1962   | 490.1897  | 87.87      | 2         | 65222   |
| 2   | 2'FL                | 11.28 | 491.1962   | 490.1897  | 86.72      | 2         | 235638  |
|     | 2'FL                | 11.77 | 491.1962   | 490.1897  | 85.76      | 2         | 97925   |
| 3   | 3'SL                | 19.98 | 636.2397   | 635.2272  | 91.12      | 1         | 1331767 |
|     | 3'SL                | 20.85 | 636.2397   | 635.2272  | 90.58      | 1         | 940155  |
| 4   | 4120a               | 15.13 | 611.2378   | 1220.4541 | 81.5       | 5         | 236350  |
|     | 4120a               | 15.16 | 1221.4623  | 1220.4541 | 80.17      | 5         | 57913   |
| 5   | 5130a               | 19.08 | 793.7991   | 1585.5863 | 70.77      | 4         | 19404   |
| 6   | 6'SL                | 13.08 | 636.2397   | 635.2272  | 90.13      | 1         | 738048  |
|     | 6'SL                | 13.55 | 636.2397   | 635.2272  | 82.08      | 1         | 459420  |
| 7   | 6'SLN               | 13.01 | 677.2592   | 676.2538  | 80.03      | 2         | 9092    |
| 8   | DFLNHc              | 13.77 | 684.2649   | 1366.512  | 64.31      | 2         | 282607  |
| 9   | DFLNO I             | 17.00 | 866.8282   | 1731.6442 | 71         | 4         | 26563   |
| 10  | DSLNT               | 29.68 | 646.7379   | 1291.4548 | 62.14      | 1         | 16409   |
| 11  | F-LNH II, MFLNH III | 16.48 | 611.2378   | 1220.4541 | 75.92      | 3         | 202881  |
| 12  | FS-LNnH I           | 24.46 | 756.785    | 1511.5495 | 82.48      | 2         | 487771  |
| 13  | IFLNH III           | 17.65 | 1221.4623  | 1220.4541 | 81.66      | 4         | 35088   |
|     | IFLNH III           | 17.69 | 611.2378   | 1220.4541 | 78.51      | 4         | 389281  |
| 14  | LDFT                | 13.95 | 637.257    | 636.2476  | 81.89      | 1         | 349257  |
| 15  | LNDFH II            | 10.34 | 1002.3856  | 1001.3798 | 68         | 1         | 9246    |
| 16  | LNFP II             | 10.51 | 856.3296   | 855.3219  | 80.9       | 1         | 588506  |
| 17  | LNH                 | 17.75 | 538.2086   | 1074.3962 | 71.93      | 2         | 251438  |
| 18  | LNnH                | 18.56 | 538.2086   | 1074.3962 | 85.3       | 2         | 778278  |
|     | LNnH                | 18.67 | 1075.4053  | 1074.3962 | 82.36      | 2         | 102000  |
| 19  | LNT                 | 13.97 | 710.2738   | 709.264   | 92.99      | 1         | 5870987 |
| 20  | LNnT                | 14.70 | 710.2738   | 709.264   | 89.16      | 1         | 3198692 |
| 21  | LSTb                | 22.80 | 1001.369   | 1000.3594 | 83.98      | 3         | 157786  |
|     | LSTb                | 23.39 | 1001.369   | 1000.3594 | 79.6       | 3         | 78250   |
|     | LSTb                | 23.41 | 501.1885   | 1000.3594 | 71.7       | 3         | 120728  |

---

|    |          |       |          |           |       |   |        |
|----|----------|-------|----------|-----------|-------|---|--------|
| 22 | LSTc     | 22.71 | 501.1885 | 1000.3594 | 73.06 | 2 | 92299  |
| 23 | S-LNH    | 24.42 | 683.7568 | 1365.4916 | 71.36 | 3 | 29759  |
| 24 | SLNnH II | 25.07 | 683.7568 | 1365.4916 | 77.79 | 1 | 235450 |

---
